# Supplementary material
Source: PubMed Central journal article supplement (PMC8614028)
Supplement: 13031_2021_421_MOESM5_ESM.pdf [file 13031_2021_421_MOESM5_ESM.pdf]

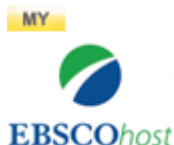

Thursday, March 04, 2021 11:09:23 PM

| #   | Query                                                                                                                                                                                                                                   | Limiters/Expanders                                                                                                                                                  | Last Run Via                                                                                                 | Results |
|-----|-----------------------------------------------------------------------------------------------------------------------------------------------------------------------------------------------------------------------------------------|---------------------------------------------------------------------------------------------------------------------------------------------------------------------|--------------------------------------------------------------------------------------------------------------|---------|
| S73 | S70 AND S71 AND S72                                                                                                                                                                                                                     | Limiters - Publication<br>Year: 1999-2021; Peer<br>Reviewed<br>Expanders - Apply related<br>words; Apply equivalent<br>subjects<br>Search modes -<br>Boolean/Phrase | Interface - EBSCOhost<br>Research Databases<br>Search Screen - Advanced<br>Search<br>Database - APA PsycInfo | 1,834   |
| S72 | S43 OR S44 OR S45 OR<br>S46 OR S47 OR S48 OR<br>S49 OR S50 OR S51 OR<br>S52 OR S53 OR S54 OR<br>S55 OR S56 OR S57 OR<br>S58 OR S59 OR S60 OR<br>S61 OR S62 OR S63 OR<br>S64 OR S65 OR S66 OR<br>S67 OR S68 OR S69                       | Expanders - Apply related<br>words; Apply equivalent<br>subjects<br>Search modes -<br>Boolean/Phrase                                                                | Interface - EBSCOhost<br>Research Databases<br>Search Screen - Advanced<br>Search<br>Database - APA PsycInfo | 460,652 |
| S71 | S32 OR S33 OR S34 OR<br>S35 OR S36 OR S37 OR<br>S38 OR S39 OR S40 OR<br>S41 OR S42                                                                                                                                                      | Expanders - Apply related<br>words; Apply equivalent<br>subjects<br>Search modes -<br>Boolean/Phrase                                                                | Interface - EBSCOhost<br>Research Databases<br>Search Screen - Advanced<br>Search<br>Database - APA PsycInfo | 147,489 |
| S70 | S1 OR S2 OR S3 OR S4<br>OR S5 OR S6 OR S7 OR<br>S8 OR S9 OR S10 OR<br>S11 OR S12 OR S13 OR<br>S14 OR S15 OR S16 OR<br>S17 OR S18 OR S19 OR<br>S20 OR S21 OR S22 OR<br>S23 OR S24 OR S25 OR<br>S26 OR S27 OR S28 OR<br>S29 OR S30 OR S31 | Expanders - Apply related<br>words; Apply equivalent<br>subjects<br>Search modes -<br>Boolean/Phrase                                                                | Interface - EBSCOhost<br>Research Databases<br>Search Screen - Advanced<br>Search<br>Database - APA PsycInfo | 218,548 |
| S69 | ("COVID-19" or "COVID<br>19" or "COVID 2019" or<br>"severe acute respiratory<br>syndrome coronavirus 2"<br>or "SARS-CoV-2" or                                                                                                           | Expanders - Apply related<br>words; Apply equivalent<br>subjects<br>Search modes -<br>Boolean/Phrase                                                                | Interface - EBSCOhost<br>Research Databases<br>Search Screen - Advanced<br>Search<br>Database - APA PsycInfo | Display |

|     |                                                                                                                 |                                                                                             |                                                                                                           |         |
|-----|-----------------------------------------------------------------------------------------------------------------|---------------------------------------------------------------------------------------------|-----------------------------------------------------------------------------------------------------------|---------|
|     | "2019-nCoV" or "2019 ncov" or ((novel or new or "2019" or wuhan or hubei or china) and (coronavirus or covid))) |                                                                                             |                                                                                                           |         |
| S68 | (MERS OR "Middle East Respiratory Syndrome")                                                                    | Expanders - Apply related words; Apply equivalent subjects<br>Search modes - Boolean/Phrase | Interface - EBSCOhost<br>Research Databases<br>Search Screen - Advanced Search<br>Database - APA PsycInfo | Display |
| S67 | (SARS OR "Severe Acute Respiratory Syndrome")                                                                   | Expanders - Apply related words; Apply equivalent subjects<br>Search modes - Boolean/Phrase | Interface - EBSCOhost<br>Research Databases<br>Search Screen - Advanced Search<br>Database - APA PsycInfo | Display |
| S66 | ebola                                                                                                           | Expanders - Apply related words; Apply equivalent subjects<br>Search modes - Boolean/Phrase | Interface - EBSCOhost<br>Research Databases<br>Search Screen - Advanced Search<br>Database - APA PsycInfo | Display |
| S65 | zika                                                                                                            | Expanders - Apply related words; Apply equivalent subjects<br>Search modes - Boolean/Phrase | Interface - EBSCOhost<br>Research Databases<br>Search Screen - Advanced Search<br>Database - APA PsycInfo | Display |
| S64 | pandemic*                                                                                                       | Expanders - Apply related words; Apply equivalent subjects<br>Search modes - Boolean/Phrase | Interface - EBSCOhost<br>Research Databases<br>Search Screen - Advanced Search<br>Database - APA PsycInfo | Display |
| S63 | epidemic*                                                                                                       | Expanders - Apply related words; Apply equivalent subjects<br>Search modes - Boolean/Phrase | Interface - EBSCOhost<br>Research Databases<br>Search Screen - Advanced Search<br>Database - APA PsycInfo | Display |
| S62 | "disease outbreak**"                                                                                            | Expanders - Apply related words; Apply equivalent subjects<br>Search modes - Boolean/Phrase | Interface - EBSCOhost<br>Research Databases<br>Search Screen - Advanced Search<br>Database - APA PsycInfo | Display |
| S61 | refugee*                                                                                                        | Expanders - Apply related words; Apply equivalent                                           | Interface - EBSCOhost<br>Research Databases                                                               | Display |

|     |                                                                                                                                    |                                                            |                                                                         |         |
|-----|------------------------------------------------------------------------------------------------------------------------------------|------------------------------------------------------------|-------------------------------------------------------------------------|---------|
|     |                                                                                                                                    | subjects                                                   | Search Screen - Advanced                                                |         |
|     |                                                                                                                                    | Search modes -                                             | Search                                                                  |         |
|     |                                                                                                                                    | Boolean/Phrase                                             | Database - APA PsycInfo                                                 |         |
| S60 | warfare                                                                                                                            | Expanders - Apply related words; Apply equivalent subjects | Interface - EBSCOhost<br>Research Databases<br>Search Screen - Advanced | Display |
|     |                                                                                                                                    | Search modes -                                             | Search                                                                  |         |
|     |                                                                                                                                    | Boolean/Phrase                                             | Database - APA PsycInfo                                                 |         |
| S59 | "fragile state"                                                                                                                    | Expanders - Apply related words; Apply equivalent subjects | Interface - EBSCOhost<br>Research Databases<br>Search Screen - Advanced | Display |
|     |                                                                                                                                    | Search modes -                                             | Search                                                                  |         |
|     |                                                                                                                                    | Boolean/Phrase                                             | Database - APA PsycInfo                                                 |         |
| S58 | war*                                                                                                                               | Expanders - Apply related words; Apply equivalent subjects | Interface - EBSCOhost<br>Research Databases<br>Search Screen - Advanced | Display |
|     |                                                                                                                                    | Search modes -                                             | Search                                                                  |         |
|     |                                                                                                                                    | Boolean/Phrase                                             | Database - APA PsycInfo                                                 |         |
| S57 | conflict*                                                                                                                          | Expanders - Apply related words; Apply equivalent subjects | Interface - EBSCOhost<br>Research Databases<br>Search Screen - Advanced | Display |
|     |                                                                                                                                    | Search modes -                                             | Search                                                                  |         |
|     |                                                                                                                                    | Boolean/Phrase                                             | Database - APA PsycInfo                                                 |         |
| S56 | (avalanche* OR cyclone* OR drought* OR earthquake* OR flood* OR hurricane* OR landslide* OR "tidal wave*" OR tsunami* OR typhoon*) | Expanders - Apply related words; Apply equivalent subjects | Interface - EBSCOhost<br>Research Databases<br>Search Screen - Advanced | Display |
|     |                                                                                                                                    | Search modes -                                             | Search                                                                  |         |
|     |                                                                                                                                    | Boolean/Phrase                                             | Database - APA PsycInfo                                                 |         |
| S55 | crisis OR crises                                                                                                                   | Expanders - Apply related words; Apply equivalent subjects | Interface - EBSCOhost<br>Research Databases<br>Search Screen - Advanced | Display |
|     |                                                                                                                                    | Search modes -                                             | Search                                                                  |         |
|     |                                                                                                                                    | Boolean/Phrase                                             | Database - APA PsycInfo                                                 |         |
| S54 | disaster*                                                                                                                          | Expanders - Apply related words; Apply equivalent subjects | Interface - EBSCOhost<br>Research Databases<br>Search Screen - Advanced | Display |
|     |                                                                                                                                    | Search modes -                                             | Search                                                                  |         |
|     |                                                                                                                                    | Boolean/Phrase                                             | Database - APA PsycInfo                                                 |         |
| S53 | emergency OR emergencies                                                                                                           | Expanders - Apply related words; Apply equivalent subjects | Interface - EBSCOhost<br>Research Databases<br>Search Screen - Advanced | Display |

|     |                                             |                                                                                                |                                                                                                           |         |
|-----|---------------------------------------------|------------------------------------------------------------------------------------------------|-----------------------------------------------------------------------------------------------------------|---------|
|     |                                             | Search modes -<br>Boolean/Phrase                                                               | Search<br>Database - APA PsycInfo                                                                         |         |
| S52 | humanitarian                                | Expanders - Apply related words; Apply equivalent subjects<br>Search modes -<br>Boolean/Phrase | Interface - EBSCOhost<br>Research Databases<br>Search Screen - Advanced Search<br>Database - APA PsycInfo | Display |
| S51 | DE "Coronavirus"                            | Expanders - Apply related words; Apply equivalent subjects<br>Search modes -<br>Boolean/Phrase | Interface - EBSCOhost<br>Research Databases<br>Search Screen - Advanced Search<br>Database - APA PsycInfo | Display |
| S50 | DE "Middle East Respiratory Syndrome"       | Expanders - Apply related words; Apply equivalent subjects<br>Search modes -<br>Boolean/Phrase | Interface - EBSCOhost<br>Research Databases<br>Search Screen - Advanced Search<br>Database - APA PsycInfo | Display |
| S49 | (DE "Severe Acute Respiratory Syndrome")    | Expanders - Apply related words; Apply equivalent subjects<br>Search modes -<br>Boolean/Phrase | Interface - EBSCOhost<br>Research Databases<br>Search Screen - Advanced Search<br>Database - APA PsycInfo | Display |
| S48 | DE "Pandemics"                              | Expanders - Apply related words; Apply equivalent subjects<br>Search modes -<br>Boolean/Phrase | Interface - EBSCOhost<br>Research Databases<br>Search Screen - Advanced Search<br>Database - APA PsycInfo | Display |
| S47 | DE "Disease Outbreaks"<br>OR DE "Epidemics" | Expanders - Apply related words; Apply equivalent subjects<br>Search modes -<br>Boolean/Phrase | Interface - EBSCOhost<br>Research Databases<br>Search Screen - Advanced Search<br>Database - APA PsycInfo | Display |
| S46 | DE "Refugees"                               | Expanders - Apply related words; Apply equivalent subjects<br>Search modes -<br>Boolean/Phrase | Interface - EBSCOhost<br>Research Databases<br>Search Screen - Advanced Search<br>Database - APA PsycInfo | Display |
| S45 | DE "War"                                    | Expanders - Apply related words; Apply equivalent subjects<br>Search modes -<br>Boolean/Phrase | Interface - EBSCOhost<br>Research Databases<br>Search Screen - Advanced Search<br>Database - APA PsycInfo | Display |

|     |                                            |                                                                                             |                                                                                                           |         |
|-----|--------------------------------------------|---------------------------------------------------------------------------------------------|-----------------------------------------------------------------------------------------------------------|---------|
| S44 | DE "Conflict" OR DE "Violence" OR DE "War" | Expanders - Apply related words; Apply equivalent subjects<br>Search modes - Boolean/Phrase | Interface - EBSCOhost<br>Research Databases<br>Search Screen - Advanced Search<br>Database - APA PsycInfo | Display |
| S43 | DE "Disasters" OR DE "Natural Disasters"   | Expanders - Apply related words; Apply equivalent subjects<br>Search modes - Boolean/Phrase | Interface - EBSCOhost<br>Research Databases<br>Search Screen - Advanced Search<br>Database - APA PsycInfo | Display |
| S42 | "collective N3 efficacy"                   | Expanders - Apply related words; Apply equivalent subjects<br>Search modes - Boolean/Phrase | Interface - EBSCOhost<br>Research Databases<br>Search Screen - Advanced Search<br>Database - APA PsycInfo | Display |
| S41 | "social support**"                         | Expanders - Apply related words; Apply equivalent subjects<br>Search modes - Boolean/Phrase | Interface - EBSCOhost<br>Research Databases<br>Search Screen - Advanced Search<br>Database - APA PsycInfo | 84,205  |
| S40 | "social network**"                         | Expanders - Apply related words; Apply equivalent subjects<br>Search modes - Boolean/Phrase | Interface - EBSCOhost<br>Research Databases<br>Search Screen - Advanced Search<br>Database - APA PsycInfo | 38,016  |
| S39 | "social norm**"                            | Expanders - Apply related words; Apply equivalent subjects<br>Search modes - Boolean/Phrase | Interface - EBSCOhost<br>Research Databases<br>Search Screen - Advanced Search<br>Database - APA PsycInfo | 13,733  |
| S38 | "social cohesion"                          | Expanders - Apply related words; Apply equivalent subjects<br>Search modes - Boolean/Phrase | Interface - EBSCOhost<br>Research Databases<br>Search Screen - Advanced Search<br>Database - APA PsycInfo | Display |
| S37 | "social capital"                           | Expanders - Apply related words; Apply equivalent subjects<br>Search modes - Boolean/Phrase | Interface - EBSCOhost<br>Research Databases<br>Search Screen - Advanced Search<br>Database - APA PsycInfo | Display |
| S36 | DE "Social Support"                        | Expanders - Apply related                                                                   | Interface - EBSCOhost                                                                                     | Display |

|     |                                                                                                                                   |                                                                                             |                                                                                                           |         |
|-----|-----------------------------------------------------------------------------------------------------------------------------------|---------------------------------------------------------------------------------------------|-----------------------------------------------------------------------------------------------------------|---------|
|     |                                                                                                                                   | words; Apply equivalent subjects<br>Search modes - Boolean/Phrase                           | Research Databases<br>Search Screen - Advanced Search<br>Database - APA PsycInfo                          |         |
| S35 | DE "Social Networks"                                                                                                              | Expanders - Apply related words; Apply equivalent subjects<br>Search modes - Boolean/Phrase | Interface - EBSCOhost<br>Research Databases<br>Search Screen - Advanced Search<br>Database - APA PsycInfo | Display |
| S34 | DE "Social Norms"                                                                                                                 | Expanders - Apply related words; Apply equivalent subjects<br>Search modes - Boolean/Phrase | Interface - EBSCOhost<br>Research Databases<br>Search Screen - Advanced Search<br>Database - APA PsycInfo | Display |
| S33 | DE "Group Cohesion"                                                                                                               | Expanders - Apply related words; Apply equivalent subjects<br>Search modes - Boolean/Phrase | Interface - EBSCOhost<br>Research Databases<br>Search Screen - Advanced Search<br>Database - APA PsycInfo | Display |
| S32 | DE "Social Capital"                                                                                                               | Expanders - Apply related words; Apply equivalent subjects<br>Search modes - Boolean/Phrase | Interface - EBSCOhost<br>Research Databases<br>Search Screen - Advanced Search<br>Database - APA PsycInfo | Display |
| S31 | "women's health"                                                                                                                  | Expanders - Apply related words; Apply equivalent subjects<br>Search modes - Boolean/Phrase | Interface - EBSCOhost<br>Research Databases<br>Search Screen - Advanced Search<br>Database - APA PsycInfo | Display |
| S30 | "reproductive rights"                                                                                                             | Expanders - Apply related words; Apply equivalent subjects<br>Search modes - Boolean/Phrase | Interface - EBSCOhost<br>Research Databases<br>Search Screen - Advanced Search<br>Database - APA PsycInfo | Display |
| S29 | ("gender-based violence" OR "spouse abuse" OR "intimate partner violence" OR DE "Intimate Partner Violence" OR DE "Sexual Abuse") | Expanders - Apply related words; Apply equivalent subjects<br>Search modes - Boolean/Phrase | Interface - EBSCOhost<br>Research Databases<br>Search Screen - Advanced Search<br>Database - APA PsycInfo | Display |
| S28 | "maternal health"                                                                                                                 | Expanders - Apply related words; Apply equivalent                                           | Interface - EBSCOhost<br>Research Databases                                                               | Display |

|     |                                                                                                                                                                                     |                                                                                                |                                                                                                              |         |
|-----|-------------------------------------------------------------------------------------------------------------------------------------------------------------------------------------|------------------------------------------------------------------------------------------------|--------------------------------------------------------------------------------------------------------------|---------|
|     |                                                                                                                                                                                     | subjects<br>Search modes -<br>Boolean/Phrase                                                   | Search Screen - Advanced<br>Search<br>Database - APA PsycInfo                                                |         |
| S27 | "maternal and newborn health"                                                                                                                                                       | Expanders - Apply related words; Apply equivalent subjects<br>Search modes -<br>Boolean/Phrase | Interface - EBSCOhost<br>Research Databases<br>Search Screen - Advanced<br>Search<br>Database - APA PsycInfo | Display |
| S26 | STIs                                                                                                                                                                                | Expanders - Apply related words; Apply equivalent subjects<br>Search modes -<br>Boolean/Phrase | Interface - EBSCOhost<br>Research Databases<br>Search Screen - Advanced<br>Search<br>Database - APA PsycInfo | Display |
| S25 | AIDS                                                                                                                                                                                | Expanders - Apply related words; Apply equivalent subjects<br>Search modes -<br>Boolean/Phrase | Interface - EBSCOhost<br>Research Databases<br>Search Screen - Advanced<br>Search<br>Database - APA PsycInfo | Display |
| S24 | HIV                                                                                                                                                                                 | Expanders - Apply related words; Apply equivalent subjects<br>Search modes -<br>Boolean/Phrase | Interface - EBSCOhost<br>Research Databases<br>Search Screen - Advanced<br>Search<br>Database - APA PsycInfo | Display |
| S23 | "HIV/AIDS"                                                                                                                                                                          | Expanders - Apply related words; Apply equivalent subjects<br>Search modes -<br>Boolean/Phrase | Interface - EBSCOhost<br>Research Databases<br>Search Screen - Advanced<br>Search<br>Database - APA PsycInfo | Display |
| S22 | ("prenatal healthcare" OR "prenatal care" OR "postnatal care" OR "postnatal healthcare" OR "perinatal care" OR perinatal healthcare" OR "antenatal care" OR "antenatal healthcare") | Expanders - Apply related words; Apply equivalent subjects<br>Search modes -<br>Boolean/Phrase | Interface - EBSCOhost<br>Research Databases<br>Search Screen - Advanced<br>Search<br>Database - APA PsycInfo | Display |
| S21 | abortion                                                                                                                                                                            | Expanders - Apply related words; Apply equivalent subjects<br>Search modes -<br>Boolean/Phrase | Interface - EBSCOhost<br>Research Databases<br>Search Screen - Advanced<br>Search<br>Database - APA PsycInfo | Display |
| S20 | contracept*                                                                                                                                                                         | Expanders - Apply related                                                                      | Interface - EBSCOhost                                                                                        | Display |

|     |                                                                                                                         |                                                                                             |                                                                                                           |         |
|-----|-------------------------------------------------------------------------------------------------------------------------|---------------------------------------------------------------------------------------------|-----------------------------------------------------------------------------------------------------------|---------|
|     |                                                                                                                         | words; Apply equivalent subjects<br>Search modes - Boolean/Phrase                           | Research Databases<br>Search Screen - Advanced Search<br>Database - APA PsycInfo                          |         |
| S19 | "family planning"                                                                                                       | Expanders - Apply related words; Apply equivalent subjects<br>Search modes - Boolean/Phrase | Interface - EBSCOhost<br>Research Databases<br>Search Screen - Advanced Search<br>Database - APA PsycInfo | Display |
| S18 | pregnan*                                                                                                                | Expanders - Apply related words; Apply equivalent subjects<br>Search modes - Boolean/Phrase | Interface - EBSCOhost<br>Research Databases<br>Search Screen - Advanced Search<br>Database - APA PsycInfo | Display |
| S17 | "reproductive health"                                                                                                   | Expanders - Apply related words; Apply equivalent subjects<br>Search modes - Boolean/Phrase | Interface - EBSCOhost<br>Research Databases<br>Search Screen - Advanced Search<br>Database - APA PsycInfo | Display |
| S16 | "sexual health"                                                                                                         | Expanders - Apply related words; Apply equivalent subjects<br>Search modes - Boolean/Phrase | Interface - EBSCOhost<br>Research Databases<br>Search Screen - Advanced Search<br>Database - APA PsycInfo | Display |
| S15 | "sexual and reproductive health"                                                                                        | Expanders - Apply related words; Apply equivalent subjects<br>Search modes - Boolean/Phrase | Interface - EBSCOhost<br>Research Databases<br>Search Screen - Advanced Search<br>Database - APA PsycInfo | Display |
| S14 | DE "Adolescent Pregnancy"                                                                                               | Expanders - Apply related words; Apply equivalent subjects<br>Search modes - Boolean/Phrase | Interface - EBSCOhost<br>Research Databases<br>Search Screen - Advanced Search<br>Database - APA PsycInfo | Display |
| S13 | DE "Sexually Transmitted Diseases" OR DE "AIDS" OR DE "Gonorrhea" OR DE "Herpes Genitalis" OR DE "HIV" OR DE "Syphilis" | Expanders - Apply related words; Apply equivalent subjects<br>Search modes - Boolean/Phrase | Interface - EBSCOhost<br>Research Databases<br>Search Screen - Advanced Search<br>Database - APA PsycInfo | Display |
| S12 | DE "AIDS (Attitudes Toward)"                                                                                            | Expanders - Apply related words; Apply equivalent                                           | Interface - EBSCOhost<br>Research Databases                                                               | Display |



|     |                                                                                                    |                                                            |                                                                         |         |
|-----|----------------------------------------------------------------------------------------------------|------------------------------------------------------------|-------------------------------------------------------------------------|---------|
|     |                                                                                                    | subjects                                                   | Search Screen - Advanced                                                |         |
|     |                                                                                                    | Search modes -                                             | Search                                                                  |         |
|     |                                                                                                    | Boolean/Phrase                                             | Database - APA PsycInfo                                                 |         |
| S11 | DE "AIDS"                                                                                          | Expanders - Apply related words; Apply equivalent subjects | Interface - EBSCOhost<br>Research Databases<br>Search Screen - Advanced | Display |
|     |                                                                                                    | Search modes -                                             | Search                                                                  |         |
|     |                                                                                                    | Boolean/Phrase                                             | Database - APA PsycInfo                                                 |         |
| S10 | DE "HIV" OR DE "AIDS"                                                                              | Expanders - Apply related words; Apply equivalent subjects | Interface - EBSCOhost<br>Research Databases<br>Search Screen - Advanced | Display |
|     |                                                                                                    | Search modes -                                             | Search                                                                  |         |
|     |                                                                                                    | Boolean/Phrase                                             | Database - APA PsycInfo                                                 |         |
| S9  | (DE "Prenatal Care" OR DE "Postnatal Period" OR DE "Perinatal Period")                             | Expanders - Apply related words; Apply equivalent subjects | Interface - EBSCOhost<br>Research Databases<br>Search Screen - Advanced | Display |
|     |                                                                                                    | Search modes -                                             | Search                                                                  |         |
|     |                                                                                                    | Boolean/Phrase                                             | Database - APA PsycInfo                                                 |         |
| S8  | DE "Abortion (Attitudes Toward)"                                                                   | Expanders - Apply related words; Apply equivalent subjects | Interface - EBSCOhost<br>Research Databases<br>Search Screen - Advanced | Display |
|     |                                                                                                    | Search modes -                                             | Search                                                                  |         |
|     |                                                                                                    | Boolean/Phrase                                             | Database - APA PsycInfo                                                 |         |
| S7  | DE "Induced Abortion"                                                                              | Expanders - Apply related words; Apply equivalent subjects | Interface - EBSCOhost<br>Research Databases<br>Search Screen - Advanced | Display |
|     |                                                                                                    | Search modes -                                             | Search                                                                  |         |
|     |                                                                                                    | Boolean/Phrase                                             | Database - APA PsycInfo                                                 |         |
| S6  | DE "Birth Control" OR DE "Contraceptive Devices" OR DE "Rhythm Method" OR DE "Sterilization (Sex)" | Expanders - Apply related words; Apply equivalent subjects | Interface - EBSCOhost<br>Research Databases<br>Search Screen - Advanced | Display |
|     |                                                                                                    | Search modes -                                             | Search                                                                  |         |
|     |                                                                                                    | Boolean/Phrase                                             | Database - APA PsycInfo                                                 |         |
| S5  | DE "Family Planning Attitudes"                                                                     | Expanders - Apply related words; Apply equivalent subjects | Interface - EBSCOhost<br>Research Databases<br>Search Screen - Advanced | Display |
|     |                                                                                                    | Search modes -                                             | Search                                                                  |         |
|     |                                                                                                    | Boolean/Phrase                                             | Database - APA PsycInfo                                                 |         |
| S4  | DE "Family Planning" OR DE "Birth Control" OR DE "Delayed Parenthood"                              | Expanders - Apply related words; Apply equivalent subjects | Interface - EBSCOhost<br>Research Databases<br>Search Screen - Advanced | Display |

|    |                                                                                                                                |                                                                                                      |                                                                                                              |         |
|----|--------------------------------------------------------------------------------------------------------------------------------|------------------------------------------------------------------------------------------------------|--------------------------------------------------------------------------------------------------------------|---------|
|    |                                                                                                                                | Search modes -<br>Boolean/Phrase                                                                     | Search<br>Database - APA PsycInfo                                                                            |         |
| S3 | (DE "Pregnancy" ) OR<br>(DE "Pregnancy" OR DE<br>"Adolescent Pregnancy"<br>OR DE "Pregnancy<br>Outcomes" OR DE<br>"Primipara") | Expanders - Apply related<br>words; Apply equivalent<br>subjects<br>Search modes -<br>Boolean/Phrase | Interface - EBSCOhost<br>Research Databases<br>Search Screen - Advanced<br>Search<br>Database - APA PsycInfo | Display |
| S2 | DE "Reproductive Health"                                                                                                       | Expanders - Apply related<br>words; Apply equivalent<br>subjects<br>Search modes -<br>Boolean/Phrase | Interface - EBSCOhost<br>Research Databases<br>Search Screen - Advanced<br>Search<br>Database - APA PsycInfo | Display |
| S1 | DE "Sexual Health"                                                                                                             | Expanders - Apply related<br>words; Apply equivalent<br>subjects<br>Search modes -<br>Boolean/Phrase | Interface - EBSCOhost<br>Research Databases<br>Search Screen - Advanced<br>Search<br>Database - APA PsycInfo | Display |
